# Supplementary material
Source: PubMed Central journal article supplement (PMC8291220)
Supplement: NIHMS1715562-supplement-Path_802_Course_Syllabus.pdf [file NIHMS1715562-supplement-Path_802_Course_Syllabus.pdf]

**Supplementary Material: Pathology 802 Sample Fall Semester Course Syllabus**

|                                         |                                                                                                                                                                    |
|-----------------------------------------|--------------------------------------------------------------------------------------------------------------------------------------------------------------------|
| <b>Tuesday/Lecture 1</b>                | Course Introduction<br><ul style="list-style-type: none"> <li>• 10:45-11:45 am: General Conference Room</li> </ul>                                                 |
| <b>Friday/Lecture 2</b>                 | Cell Structure: Part I<br><ul style="list-style-type: none"> <li>• 10:45-11: : General Conference Room</li> </ul>                                                  |
| <b>Friday/Autopsy Conference</b>        | Autopsy Conference<br><ul style="list-style-type: none"> <li>• 12:00-1:00 pm: Morgue Conference Room</li> </ul>                                                    |
| <b>Tuesday/Slide Session 1</b>          | Basic Organ/Tissue Histology Slide Session<br><ul style="list-style-type: none"> <li>• 9:30-10:30 am: Multi-headed Scope</li> </ul>                                |
| <b>Tuesday/Lecture 3</b>                | Cell structure: Part II<br><ul style="list-style-type: none"> <li>• 10:45-11:45 am: General Conference Room</li> </ul>                                             |
| <b>Friday/Lecture 4</b>                 | Epithelium/Connective Tissue<br><ul style="list-style-type: none"> <li>• 10:45-11:45 am: General Conference Room</li> </ul>                                        |
| <b>Friday/Autopsy Conference</b>        | Autopsy Conference<br><ul style="list-style-type: none"> <li>• 12:00-1:00 pm: Morgue Conference Room</li> </ul>                                                    |
| <b>Tuesday/ Autopsy Case Exercise I</b> | Graded Case-Based Exercise<br><ul style="list-style-type: none"> <li>• 9:30-10:30 am: Morgue Conference Room</li> </ul>                                            |
| <b>Tuesday/Lecture 5</b>                | Inflammation/Repair<br><ul style="list-style-type: none"> <li>• 10:45-11:45 am: General Conference Room</li> </ul>                                                 |
| <b>Friday//Lecture 6</b>                | Pulmonary (Normal)<br><ul style="list-style-type: none"> <li>• 10:45-11:45 am: General Conference Room</li> </ul>                                                  |
| <b>Friday/Autopsy Conference</b>        | Autopsy Conference<br><ul style="list-style-type: none"> <li>• 12:00-1:00 pm: Morgue Conference Room</li> </ul>                                                    |
| <b>*Tuesday/Slide Session 2</b>         | Epithelium/Connective Tissue<br><ul style="list-style-type: none"> <li>• 9:30-10:30 am: Multi-headed Scope</li> </ul>                                              |
| <b>Tuesday/Lecture 7</b>                | Pulmonary Pathology (emphasis: acute and chronic inflammation)<br><ul style="list-style-type: none"> <li>• 10:45-11:45 am: General Conference Room</li> </ul>      |
| <b>Friday/Lecture 8</b>                 | Liver (Normal)<br><ul style="list-style-type: none"> <li>• 10:45-11:45 am: General Conference Room</li> </ul>                                                      |
| <b>Friday/Autopsy Conference</b>        | Autopsy Conference<br><ul style="list-style-type: none"> <li>• 12:00-1:00 pm: Morgue Conference Room</li> </ul>                                                    |
| <b>Tuesday/Slide Session 3</b>          | Pulmonary Pathology Slide Session<br><ul style="list-style-type: none"> <li>• 9:30-10:30 am: Multi-headed Scope</li> </ul>                                         |
| <b>Tuesday/Lecture 9</b>                | Liver Pathology (emphasis: repair/regeneration/storage dysfunction)<br><ul style="list-style-type: none"> <li>• 10:45-11:45 am: General Conference Room</li> </ul> |
| <b>Friday/Lecture 10</b>                | Gastrointestinal Tract (Normal)<br>10:45-11:45 am: General Conference Room                                                                                         |
| <b>Friday/Autopsy Conference</b>        | Autopsy Conference<br><ul style="list-style-type: none"> <li>• 12:00-1:00 pm: Morgue Conference Room</li> </ul>                                                    |

|                                         |                                                                                                                                                                                                |
|-----------------------------------------|------------------------------------------------------------------------------------------------------------------------------------------------------------------------------------------------|
| <b>Tuesday/ Autopsy Case Exercise 2</b> | Graded Case-Based Exercise <ul style="list-style-type: none"> <li>• 9:30-10:30 am: Morgue Conference Room</li> </ul>                                                                           |
| <b>Tuesday/Lecture 11</b>               | Gastrointestinal Tract Pathology (emphasis: carcinogenesis sequence) <ul style="list-style-type: none"> <li>• 10:45-11:45am: General Conference Room</li> </ul>                                |
| <b>Friday/Lecture 12</b>                | Hematopoietic System (Normal) <ul style="list-style-type: none"> <li>• 10:45-11:45 am: General Conference Room</li> </ul>                                                                      |
| <b>Friday/Autopsy Conference</b>        | Autopsy Conference <ul style="list-style-type: none"> <li>• 12:00-1:00 pm: Morgue Conference Room</li> </ul>                                                                                   |
| <b>Tuesday/Slide Session 4</b>          | Gastrointestinal Pathology Slide Session <ul style="list-style-type: none"> <li>• 9:30-10:30 am: Multi-headed Scope</li> </ul>                                                                 |
| <b>Tuesday/Lecture 13</b>               | Hematopoietic System Pathology (emphasis: self-renewal/stem cells/cell signaling) <ul style="list-style-type: none"> <li>• 10:45-11:45 am: General Conference Room</li> </ul>                  |
| <b>Friday/Lecture 14</b>                | Neoplasia <ul style="list-style-type: none"> <li>• 10:45-11:45 am: General Conference Room</li> </ul>                                                                                          |
| <b>Friday/Autopsy Conference</b>        | Autopsy Conference <ul style="list-style-type: none"> <li>• 12:00-1:00 pm: Morgue Conference Room</li> </ul>                                                                                   |
| <b>Tuesday/Slide Session 5</b>          | Hematopathology Slide Session <ul style="list-style-type: none"> <li>• 9:30-10:30am: Multi-headed Scope</li> </ul>                                                                             |
| <b>Tuesday/Lecture 15</b>               | Cardiovascular System (Normal) <ul style="list-style-type: none"> <li>• 10:45-11:45am: General Conference Room</li> </ul>                                                                      |
| <b>Friday/Lecture 16</b>                | Cardiovascular System Pathology (emphasis: cell injury/necrosis/ arteriosclerosis) <ul style="list-style-type: none"> <li>• 10:45-11:45 am: General Conference Room</li> </ul>                 |
| <b>Friday/Autopsy Conference</b>        | Autopsy Conference <ul style="list-style-type: none"> <li>• 12:00-1:00 pm: Morgue Conference Room</li> </ul>                                                                                   |
| <b>Tuesday/Autopsy Case Exercise 3</b>  | Graded Case-Based Exercise <ul style="list-style-type: none"> <li>• 9:30-10:30 am: Morgue Conference Room</li> </ul>                                                                           |
| <b>Tuesday/Lecture 17</b>               | Renal System (Normal) <ul style="list-style-type: none"> <li>• 10:45-11:45 am: General Conference Room</li> </ul>                                                                              |
| <b>Friday/Lecture 18</b>                | Renal System Pathology (emphasis: immune-complex mediated glomerular disease/transplant rejection) <ul style="list-style-type: none"> <li>• 10:45-11:45 am: General Conference Room</li> </ul> |
| <b>Friday/Autopsy Conference</b>        | Autopsy Conference <ul style="list-style-type: none"> <li>• 12:00-1:00 pm: Morgue Conference Room</li> </ul>                                                                                   |
| <b>Tuesday/Slide Session 6</b>          | Cardiovascular Pathology Slide Session <ul style="list-style-type: none"> <li>• 9:30-10:30 am: Multi-headed Scope</li> </ul>                                                                   |
| <b>Tuesday/Lecture 19</b>               | Endocrine System (Normal) <ul style="list-style-type: none"> <li>• 10:45-11:45 am: General Conference Room</li> </ul>                                                                          |
| <b>Friday/Lecture 20</b>                | Endocrine System Pathology (emphasis: hyperplasia/autoimmune and familial disease) <ul style="list-style-type: none"> <li>• 10:45-11:45 am: General Conference Room</li> </ul>                 |

|                                        |                                                                                                                                                                                         |
|----------------------------------------|-----------------------------------------------------------------------------------------------------------------------------------------------------------------------------------------|
| <b>Friday/Autopsy Conference</b>       | Autopsy Conference <ul style="list-style-type: none"> <li>• 12:00-1:00 pm: Morgue Conference Room</li> </ul>                                                                            |
| <b>Tuesday/Autopsy Case Exercise 4</b> | Team Case-Based Exercise <ul style="list-style-type: none"> <li>• 9:30-10:30 am: Morgue Conference Room</li> </ul>                                                                      |
| <b>Tuesday/Lecture 21</b>              | Central Nervous System (Normal) <ul style="list-style-type: none"> <li>• 10:45-11:45 am: General Conference Room</li> </ul>                                                             |
| <b>Friday/Lecture 22</b>               | Central Nervous System Pathology (emphasis: infection/hypoxic/ischemic injury) <ul style="list-style-type: none"> <li>• 10:45-11:45 am: General Conference Room</li> </ul>              |
| <b>Friday/Autopsy Conference</b>       | Autopsy Conference <ul style="list-style-type: none"> <li>• 12:00-1:00 pm: Morgue Conference Room</li> </ul>                                                                            |
| <b>Tuesday/ Slide Session 7</b>        | Endocrine Pathology Slide Session <ul style="list-style-type: none"> <li>• 9:30-10:30 am: Multi-headed Scope</li> </ul>                                                                 |
| <b>Tuesday/Lecture 23</b>              | Female Reproductive System (Normal) <ul style="list-style-type: none"> <li>• 10:45-11:45 am: General Conference Room</li> </ul>                                                         |
| <b>THANKSGIVING BREAK</b>              |                                                                                                                                                                                         |
| <b>Tuesday/ Slide Session 8</b>        | Central Nervous System Slide Session <ul style="list-style-type: none"> <li>• 9:30-10:30 am: Multi-headed Scope</li> </ul>                                                              |
| <b>Tuesday/Lecture 24</b>              | Female Reproductive System Pathology (emphasis: HPV-driven cervical dysplasia/carcinoma) <ul style="list-style-type: none"> <li>• 10:45-11:45 am: General Conference Room</li> </ul>    |
| <b>Friday/Lecture 25</b>               | Male Genitourinary System (Normal) <ul style="list-style-type: none"> <li>• 10:45-11:45 am: General Conference Room</li> </ul>                                                          |
| <b>Friday/Autopsy Conference</b>       | Autopsy Conference <ul style="list-style-type: none"> <li>• 12:00-1:00 pm: Morgue Conference Room</li> </ul>                                                                            |
| <b>Tuesday/Slide Session 9</b>         | Female Reproductive System Cytology <ul style="list-style-type: none"> <li>• 9:30-10:30 am: Multi-headed Scope</li> </ul>                                                               |
| <b>Tuesday/Lecture 26</b>              | Male Genitourinary System Pathology (emphasis: atrophy/hypertrophy/ hyperplasia/metaplasia) <ul style="list-style-type: none"> <li>• 10:45-11:45 am: General Conference Room</li> </ul> |
| <b>Friday/Review Session</b>           | Exam Question-and-Answer Review Session <ul style="list-style-type: none"> <li>• 10:45-11:45 am: General Conference Room</li> </ul>                                                     |
| <b>Friday/Autopsy Conference</b>       | Autopsy Conference <ul style="list-style-type: none"> <li>• 12:00-1:00 pm: Morgue Conference Room</li> </ul>                                                                            |
| <b>Tuesday, 12.13.16</b>               | Exam Question-and-Answer Review Session <ul style="list-style-type: none"> <li>• 9:30-10:30 am: General Conference Room</li> </ul>                                                      |
| <b>Final Exam</b>                      | 50 Question Multiple Choice Exam <ul style="list-style-type: none"> <li>• 8:00-11:00 am: Computer Lab</li> </ul>                                                                        |

\*Note: starting in the 3<sup>rd</sup> or 4<sup>th</sup> week, students are sequentially placed “on-call” for a week of autopsy observation
